# Supplementary material for: Outcomes of Acute Aortic Dissection Surgery in Octogenarians
Source: PubMed Central journal article supplement — J Am Heart Assoc. 2020 Sep 11;9(18):e017147. doi: 10.1161/JAHA.120.017147 (PMC7726989; doi:10.1161/jaha.120.017147), 2020-09-11
Supplement: JAH3-9-e017147-s001.pdf [file JAH3-9-e017147-s001.pdf]

# **SUPPLEMENTAL MATERIAL**

**Table S1. ICD-9-CM code used in the current study.**

| Variable                              | Code                                                                                                                                                                  |
|---------------------------------------|-----------------------------------------------------------------------------------------------------------------------------------------------------------------------|
| Aortic dissection                     | 441.0x                                                                                                                                                                |
| Marfan syndrome                       | 759.82                                                                                                                                                                |
| Hypertension                          | 401.xx-405.xx                                                                                                                                                         |
| Diabetes mellitus                     | 250.xx                                                                                                                                                                |
| Heart failure                         | 428.xx                                                                                                                                                                |
| Old myocardial infarction             | 410.xx, 412.xx                                                                                                                                                        |
| Peripheral arterial disease           | 440.0x, 440.2x, 440.3x, 440.8x, 440.9x,<br>443.xx, 444.0x, 444.22, 444.8x, 447.8x,<br>447.9x                                                                          |
| Atrial fibrillation                   | 427.31                                                                                                                                                                |
| Stroke                                | 430.xx-437.xx                                                                                                                                                         |
| Chronic kidney disease                | 580.xx-589.xx, 403.xx-404.xx, 016.0x,<br>095.4x, 236.9x, 250.4x, 274.1x, 442.1x,<br>447.3x, 440.1x, 572.4x, 642.1x, 646.2x,<br>753.1x, 283.11, 403.01, 404.02, 446.21 |
| Liver cirrhosis                       | 571.2x, 571.5x, 571.6x                                                                                                                                                |
| Coagulopathy                          | 286.0-286.9, 287.1, 287.3-287.5, 289.81,<br>289.82                                                                                                                    |
| Chronic obstructive pulmonary disease | 491.xx, 492.xx, 496.xx                                                                                                                                                |
| Respiratory failure                   | 518.xx                                                                                                                                                                |
| Ischemic stroke                       | 433.xx-437.xx                                                                                                                                                         |
| Hemorrhagic stroke                    | 430.xx-432.xx                                                                                                                                                         |
| Dialysis                              | 585.xx (Catastrophic illness card)                                                                                                                                    |
| Sepsis                                | 038.xx, 790.7                                                                                                                                                         |
| Acute myocardial infarction           | 410.xx                                                                                                                                                                |

ICD-9-CM, International Classification of Diseases, Ninth Revision, Clinical Modification code.

**Table S2. The baseline characteristics in octogenarians with AAD who underwent type A surgeries, type B surgeries, and who did not undergo surgery.**

| Variable                            | Type A<br>surgery<br>(n = 206) | Type B<br>surgery<br>(n = 79) | Nonsurgery<br>(n = 1,957)  | P<br>value |
|-------------------------------------|--------------------------------|-------------------------------|----------------------------|------------|
| <b>Characteristic</b>               |                                |                               |                            |            |
| Age, years                          | 83.7±2.7                       | 84.5±3.7                      | 85.4±4.1 <sup>a</sup>      | <0.001     |
| Male                                | 89 (43.2)                      | 61 (77.2) <sup>a</sup>        | 1,174 (60.0) <sup>ab</sup> | <0.001     |
| <b>Baseline comorbidity</b>         |                                |                               |                            |            |
| Marfan syndrome                     | 0 (0.0)                        | 0 (0.0)                       | 0 (0.0)                    | NA         |
| Hypertension                        | 141 (68.4)                     | 63 (79.7)                     | 1,530 (78.2) <sup>a</sup>  | 0.006      |
| Diabetes mellitus                   | 39 (18.9)                      | 8 (10.1)                      | 404 (20.6)                 | 0.066      |
| Heart failure                       | 33 (16.0)                      | 4 (5.1) <sup>a</sup>          | 349 (17.8) <sup>b</sup>    | 0.012      |
| Old myocardial infarction           | 2 (1.0)                        | 6 (7.6) <sup>a</sup>          | 136 (6.9) <sup>a</sup>     | 0.004      |
| Peripheral arterial disease         | 7 (3.4)                        | 9 (11.4) <sup>a</sup>         | 147 (7.5)                  | 0.034      |
| Atrial fibrillation                 | 31 (15.0)                      | 3 (3.8) <sup>a</sup>          | 278 (14.2) <sup>b</sup>    | 0.029      |
| Old stroke                          | 30 (14.6)                      | 8 (10.1)                      | 466 (23.8) <sup>a</sup>    | <0.001     |
| Chronic kidney disease              | 13 (6.3)                       | 7 (8.9)                       | 334 (17.1) <sup>a</sup>    | <0.001     |
| Liver cirrhosis                     | 3 (1.5)                        | 2 (2.5)                       | 46 (2.4)                   | 0.707      |
| Coagulopathy                        | 6 (2.9)                        | 1 (1.3)                       | 60 (3.1)                   | 0.653      |
| COPD                                | 21 (10.2)                      | 10 (12.7)                     | 512 (26.2) <sup>a</sup>    | <0.001     |
| Previous cardiac surgery            | 4 (1.9)                        | 1 (1.3)                       | 40 (2.0)                   | 0.888      |
| CCI score                           | 2.7±1.8                        | 2.6±1.8                       | 3.6±2.4 <sup>ab</sup>      | <0.001     |
| <b>Index year</b>                   |                                |                               |                            | 0.002      |
| 2005-2007                           | 42 (20.4)                      | 12 (15.2) <sup>a</sup>        | 548 (28.0) <sup>b</sup>    |            |
| 2008-2010                           | 72 (35.0)                      | 22 (27.8)                     | 662 (33.8)                 |            |
| 2011-2013                           | 92 (44.7)                      | 45 (57.0) <sup>a</sup>        | 747 (38.2) <sup>b</sup>    |            |
| <b>In-hospital complications</b>    |                                |                               |                            |            |
| Cardiogenic shock and need<br>MCS   | 22 (10.7)                      | 1 (1.3)                       | 7 (0.4)                    | <0.001     |
| Respiratory failure                 | 60 (29.1)                      | 7 (8.9) <sup>a</sup>          | 197 (10.1) <sup>a</sup>    | <0.001     |
| New onset stroke                    | 16 (7.8)                       | 4 (5.1) <sup>a</sup>          | 76 (3.9) <sup>a</sup>      | 0.030      |
| New onset ischemic stroke           | 15 (7.3)                       | 4 (5.1)                       | 64 (3.3) <sup>a</sup>      | 0.012      |
| New onset hemorrhagic stroke        | 1 (0.5)                        | 0 (0.0)                       | 13 (0.7)                   | 0.737      |
| Re-exploration for bleeding         | 14 (6.8)                       | 1 (1.3)                       | 0 (0.0) <sup>a</sup>       | <0.001     |
| Dialysis ( <i>de novo</i> dialysis) | 40 (19.4)                      | 5 (6.3) <sup>a</sup>          | 29 (1.5) <sup>ab</sup>     | <0.001     |

| Variable                                          | Type A<br>surgery<br>( <i>n</i> = 206) | Type B<br>surgery<br>( <i>n</i> = 79) | Nonsurgery<br>( <i>n</i> = 1,957) | <i>P</i><br>value |
|---------------------------------------------------|----------------------------------------|---------------------------------------|-----------------------------------|-------------------|
| Sepsis                                            | 20 (9.7)                               | 0 (0.0) <sup>a</sup>                  | 132 (6.7)                         | 0.014             |
| Deep wound infection                              | 11 (5.3)                               | 0 (0.0)                               | 0 (0.0) <sup>a</sup>              | <0.001            |
| In hospital mortality                             | 70 (34.0)                              | 5 (6.3) <sup>a</sup>                  | 349 (17.8) <sup>ab</sup>          | <0.001            |
| ICU duration (days)                               | 12.9±14.9                              | 6.6±12.3 <sup>a</sup>                 | 2.4±5.4 <sup>ab</sup>             | <0.001            |
| In hospital stay                                  | 27.9±27.7                              | 22.6±23.4                             | 12.0±16.5 <sup>ab</sup>           | <0.001            |
| In hospital cost (NTD×10 <sup>4</sup> )           | 64.0±37.2                              | 62.7±47.5                             | 8.7±20.1 <sup>ab</sup>            | <0.001            |
| <b>Follow-up outcome</b>                          |                                        |                                       |                                   |                   |
| All-cause mortality (including in-hospital death) | 127 (61.7)                             | 35 (44.3) <sup>a</sup>                | 1,356 (69.3) <sup>b</sup>         | <0.001            |
| Follow-up (years)                                 | 1.6±2.1                                | 2.0±1.9                               | 1.7±2.0                           | 0.495             |
| MACCE (AMI/HF/stroke)                             | 23 (11.2)                              | 6 (7.6)                               | 214 (10.9)                        | 0.637             |
| Acute myocardial infarction                       | 3 (1.5)                                | 1 (1.3)                               | 34 (1.7)                          | 0.914             |
| Heart failure                                     | 13 (6.3)                               | 1 (1.3)                               | 94 (4.8)                          | 0.204             |
| Stroke                                            | 9 (4.4)                                | 4 (5.1)                               | 103 (5.3)                         | 0.858             |

AMI, acute myocardial infarction; CABG, coronary artery bypass graft; CCI, Charlson comorbidity index; COPD, chronic obstructive pulmonary disease; HF, heart failure; ICU, intensive care unit; MACCE, major adverse cardiac and cerebrovascular event; MCS, mechanical circulatory support system; NTD, New Taiwan dollar.

a, Indicated *P* < 0.05 vs. the type A surgery group.

b, Indicated *P* < 0.05 vs. the type B surgery group.

**Figure S1. Cumulative incidence of MACCE in type A surgery.**

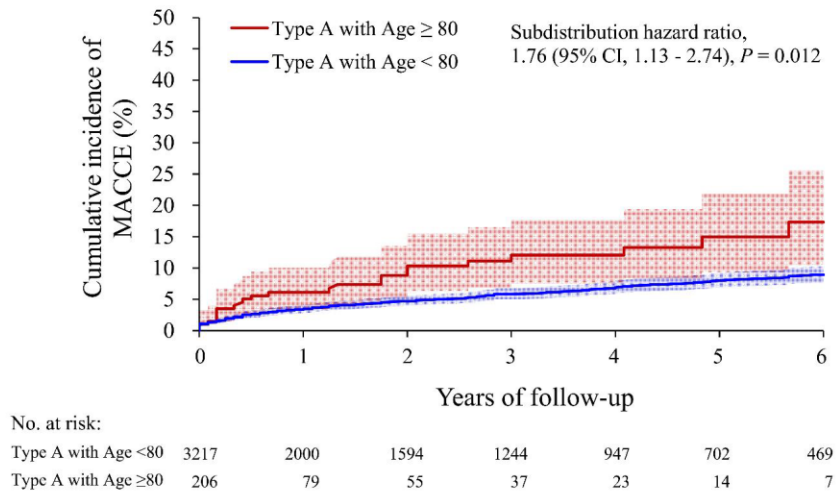

CI, confidence interval. MACCE, major adverse cardiac and cerebrovascular event.

**Figure S2. Cumulative incidence of respiratory failure in type A surgery.**

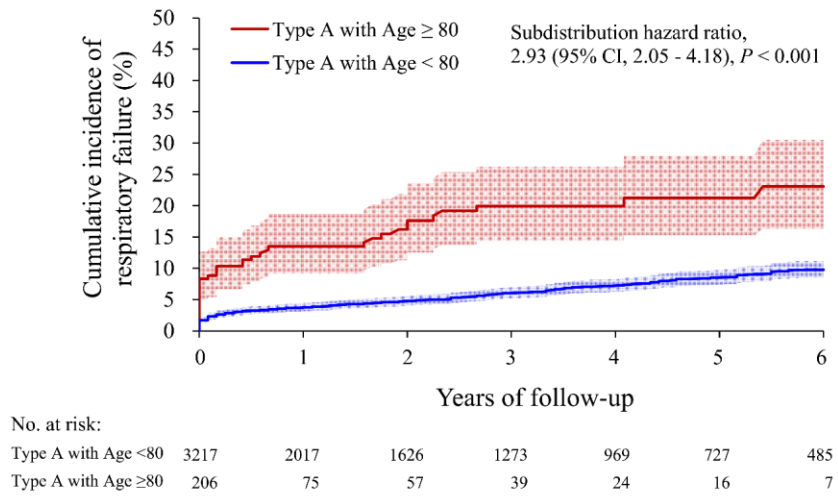

CI, confidence interval.

**Figure S3. Cumulative incidence of MACCE in type B surgery.**

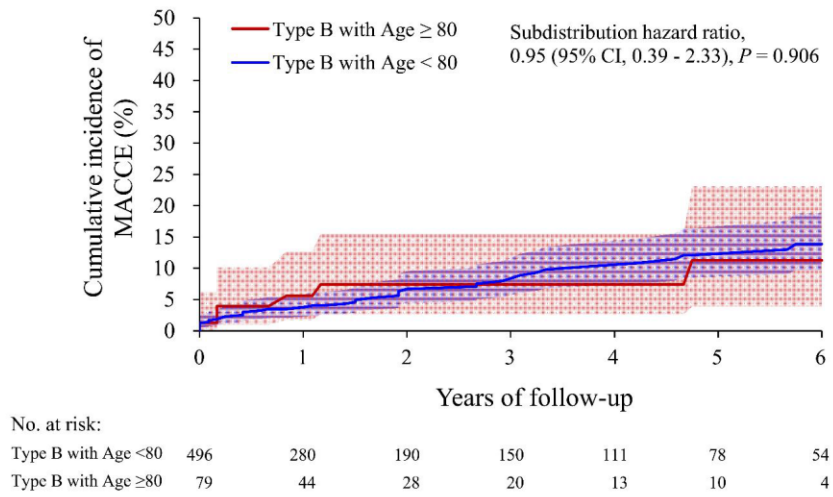

CI, confidence interval. MACCE, major adverse cardiac and cerebrovascular event.

**Figure S4. Cumulative incidence of respiratory failure in type B surgery.**

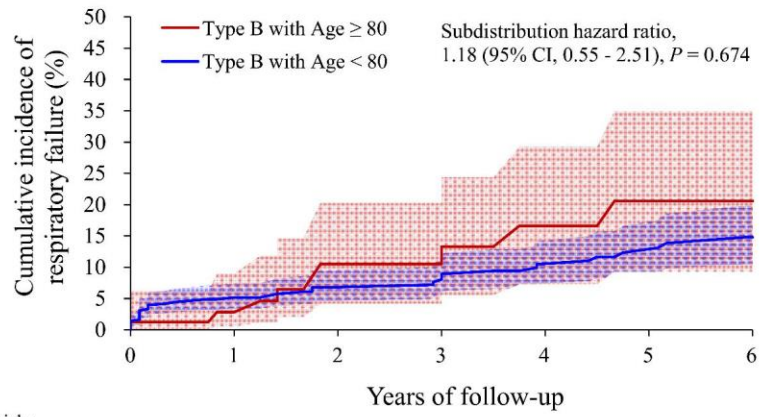

No. at risk:

|                     |     |     |     |     |     |    |    |
|---------------------|-----|-----|-----|-----|-----|----|----|
| Type B with Age <80 | 496 | 283 | 197 | 158 | 120 | 83 | 56 |
| Type B with Age ≥80 | 79  | 46  | 28  | 20  | 12  | 9  | 3  |

CI, confidence interval.
